# Supplementary material for: HE4 Predicts Progressive Fibrosis and Cardiovascular Events in Patients With Dilated Cardiomyopathy
Source: PubMed Central journal article supplement — J Am Heart Assoc. 2021 Jul 29;10(15):e021069. doi: 10.1161/JAHA.120.021069 (PMC8475713; doi:10.1161/jaha.120.021069), 2021-07-29
Supplement: JAH3-10-e021069-s001.pdf [file JAH3-10-e021069-s001.pdf]

# **SUPPLEMENTAL MATERIAL**

## Data S1.

### Supplemental Materials and Methods

|                                                  |                                                                                                                                                                                                                                                                                                                                                                                                                                                                                                                                                                                                                                                                                                                                                                                      |
|--------------------------------------------------|--------------------------------------------------------------------------------------------------------------------------------------------------------------------------------------------------------------------------------------------------------------------------------------------------------------------------------------------------------------------------------------------------------------------------------------------------------------------------------------------------------------------------------------------------------------------------------------------------------------------------------------------------------------------------------------------------------------------------------------------------------------------------------------|
| <i>Procedure and Follow up of clinical study</i> | Blood samples were collected in the stable phase during the first admission, and the serum human epididymis protein 4 (HE4) levels were measured using the CLIA method (Abbott). The coefficient of variation of HE4 among samples was less than 10%. The study primary endpoint was a composite of all-cause death, left ventricular assist device (LVAD) implantation, and hospitalization for heart failure (HF) events. Furthermore, composite of all-cause death and LVAD implantation were defined as secondary endpoint. Death, LVAD implantation and heart failure events were identified by searching the medical records and confirmed by direct contact with the patients, relatives, and caring physicians.                                                              |
| <i>Echocardiography of clinical study</i>        | Left ventricular end-diastolic diameter (LVEDD), left ventricular end-systolic diameter (LVESD), thickness of the interventricular septum, posterior ventricular wall and left atrial diameter were obtained from M-mode or two-dimensional images of parasternal long axis views. Left ventricular end-diastolic volume (LVEDV) and left ventricular end-systolic were (LVESV) were measured in apical 4-and 2-chamber windows by the Simpson method. Left ventricular (LV) ejection fraction (LVEF) was calculated by the modified Simpson method (Vivid 7 <sup>®</sup> ; GE-Vingmed Ultrasound).                                                                                                                                                                                  |
| <i>Statistical analysis of Echo data</i>         | Univariable linear regression and logistic regression analysis for $\Delta$ LVEDVi (follow-up LVEDVi – baseline LVEDVi), $\Delta$ LVESVi (follow-up LVESVi – baseline LVESVi), and left ventricular reverse remodeling (LVRR) was performed using HE4 and other variables involved in LV remodeling. <sup>12</sup> Multivariable analysis was performed using the variables achieving significance at $p < 0.05$ on univariable analysis or clinically important variables to determine the factors associated with $\Delta$ LVEDVi, $\Delta$ LVESVi, and LVRR. LVRR was defined as the combined presence of: (1) an increase in LVEF of at least 10 points or a follow-up LVEF $\geq 50\%$ ; and (2) a decrease in LVEDDi of at least 10% or an LVEDDi $\leq 33$ mm/m. <sup>3</sup> |
| <i>CMR image acquisition and Image analysis</i>  | 66 patients (76%) underwent cardiac magnetic resonance (CMR) and were checked for the presence of late gadolinium enhancement (LGE). All images were acquired using a 3.0 T scanner (Achieva 3.0 T X-series TX; Philips Medical Systems). We used electrocardiogram-gated cine imaging techniques with a segmented steady-state free precession sequence in the short and three                                                                                                                                                                                                                                                                                                                                                                                                      |

|                                           |                                                                                                                                                                                                                                                                                                                                                                                                                                                                                                                                                                                                                                                                                                                                                                                                                                                                                                                                                                                                                                                                                                                                                                                                                                                                                                                                                                                                                                                                                                                                                                                                                                                                                                                                                                                                                                                                                                                                                                                                                                                                                                                                                                           |
|-------------------------------------------|---------------------------------------------------------------------------------------------------------------------------------------------------------------------------------------------------------------------------------------------------------------------------------------------------------------------------------------------------------------------------------------------------------------------------------------------------------------------------------------------------------------------------------------------------------------------------------------------------------------------------------------------------------------------------------------------------------------------------------------------------------------------------------------------------------------------------------------------------------------------------------------------------------------------------------------------------------------------------------------------------------------------------------------------------------------------------------------------------------------------------------------------------------------------------------------------------------------------------------------------------------------------------------------------------------------------------------------------------------------------------------------------------------------------------------------------------------------------------------------------------------------------------------------------------------------------------------------------------------------------------------------------------------------------------------------------------------------------------------------------------------------------------------------------------------------------------------------------------------------------------------------------------------------------------------------------------------------------------------------------------------------------------------------------------------------------------------------------------------------------------------------------------------------------------|
|                                           | <p>long cardiac axes with LGE imaging as described previously.<sup>24</sup> Approximately 10 min after injection of 0.1 mmol/kg of a gadolinium-based contrast agent (Magnevist; Bayer Healthcare), we acquired two-dimensional inversion-recovery sequences, including the LV from base to apex. CMR images were independently analyzed by a cardiologist and a radiologist. Patients were then classified into LGE-positive or -negative groups.<sup>24</sup></p>                                                                                                                                                                                                                                                                                                                                                                                                                                                                                                                                                                                                                                                                                                                                                                                                                                                                                                                                                                                                                                                                                                                                                                                                                                                                                                                                                                                                                                                                                                                                                                                                                                                                                                       |
| <p><i>Mouse models and Procedures</i></p> | <p>Wild-type (WT) male mice on a BALB/cA background were used in this study. All procedures were performed in accordance with the Kumamoto University animal care guidelines, which conform to the Guide for the Care and Use of Laboratory Animals published by the US National Institutes of Health (publication No. 85-23, revised 1996). The study was approved by the Animal Research Ethics Committee of Kumamoto University (#A2019-122). WT male mice with BALB/cA background were purchased from Kyudo company (Saga, Japan). The mice were housed in a temperature- and humidity-controlled (24°C) room on a 12 h light/dark cycle. The 8-week-old mice were anesthetized with isofluran. The mouse myocardial infarction (MI) model was generated as previously described.<sup>13, 14</sup> Briefly, the trachea was cannulated with a polyethylene tube connected to a respirator (tidal volume, 0.6 mL; frequency, 110 breaths per minute). A left thoracotomy was performed between the fourth and fifth ribs. The pericardial tissue was removed, and the left anterior descending artery was visualized under a microscope and permanently ligated with 7-0 silk suture. Sham-operated mice underwent surgery but not left anterior descending artery ligation. At 4 weeks after MI surgery, mouse body weight, echocardiographic data, and urine output were analyzed prior to sacrifice. The mouse DCM model was generated using knock-in mice on the genetic background of BALB/cJ, in which three base-pairs coding for K210 in cTnT were deleted from the endogenous Tnnt2 gene as previously described.<sup>15</sup> 5 Homozygous mutant mice and WT mice were obtained by crossing heterozygous mutant mice, and were used as DCM and control models, respectively. MI surgery model and six-week old DCM model mouse were anesthetized with overdose isoflurane, and hearts, kidney, lung and liver were rapidly excised, and freeze clamped for subsequent analyses. <i>In vivo</i> analysis and post-euthanasia myocardial histological and molecular analyses were performed by investigators who were blinded to the experimental groups.</p> |

|                                                                                                   |                                                                                                                                                                                                                                                                                                                                                                                                                                                                                                                                                                                                                                                                                                                                                                                                                                                                                                                                                                                                                                                                       |
|---------------------------------------------------------------------------------------------------|-----------------------------------------------------------------------------------------------------------------------------------------------------------------------------------------------------------------------------------------------------------------------------------------------------------------------------------------------------------------------------------------------------------------------------------------------------------------------------------------------------------------------------------------------------------------------------------------------------------------------------------------------------------------------------------------------------------------------------------------------------------------------------------------------------------------------------------------------------------------------------------------------------------------------------------------------------------------------------------------------------------------------------------------------------------------------|
| <p><i>Echocardiography, in vivo</i></p>                                                           | <p>At 1 day before harvest, echocardiography was performed using the Xario system (Toshiba, Tokyo, Japan) with a 12-MHz linear array transducer. Heart rates and respiratory rates were continuously monitored. LV wall thickness and LV systolic and diastolic dimensions were measured in M-mode. LV percent fractional shortening were calculated. These analyses were performed by investigators who were blinded to the mice models.</p>                                                                                                                                                                                                                                                                                                                                                                                                                                                                                                                                                                                                                         |
| <p><i>Cell culture, harvest and incubation of neonatal rat cardiomyocytes and fibroblasts</i></p> | <p>Primary neonatal rat cardiomyocytes and fibroblasts were isolated from 2-day-old Wistar rats (Japan SLC, Inc). The hearts were harvested and minced and allowed to digest in 1 mg/ml Type II collagenase (Sigma Chemical Co.). After digestion, cardiomyocytes and fibroblasts were separated by Percoll density gradient centrifugation and incubated under 5% CO<sub>2</sub> and 37°C in 1 g/L glucose Dulbecco's Modified Eagle's Medium (DMEM) containing 10% fetal bovine serum (FBS), ampicillin (10 U/μl), streptomycin (10 μg/μl), and amphotericin B (25 μg/ml).</p>                                                                                                                                                                                                                                                                                                                                                                                                                                                                                      |
| <p><i>Quantitative real time PCR analysis</i></p>                                                 | <p>RNA was extracted using a RNeasy Mini Kit (QIAGEN). cDNA synthesis was performed using PrimeScript RT Master mix (TAKARA) according to the manufacturer's directions. A quantitative reverse-transcription polymerase chain reaction (qRT-PCR) was carried out for Co11a1, Co13a1, alpha smooth muscle actin (αSMA), plasminogen activator inhibitor-1 (PAI-1), fibroblast growth factor 2 (FGF2), smooth muscle protein 22 (SM22), periostin, fibronectin, transforming growth factor-β1 (TGF-β1), tumor necrosis factor-α (TNF-α), and interleukin-6 (IL-6). The reactions were carried out in technical duplicates. Primers were utilized with SYBR Green PCR Master Mix (BIO-RAD) in CFX384 Real-Time System (BIO-RAD). The data processing is based on a standard curve-based method for relative qRT-PCR. Measurements were standardized to expression of glyceraldehyde-3-phosphate dehydrogenase (GAPDH) or 18S. For <i>in vivo</i> studies, qRT-PCR was carried out for HE4 and GAPDH. <b>Table S1</b> lists the primer sequences used in this study.</p> |
| <p><i>Western blot analysis</i></p>                                                               | <p>Cells were scraped and lysed with 1% SDS lysis buffer containing protease inhibitor cocktail (Thermo). The samples were centrifuged at 20400 g for 15 min. The supernatant was collected, and protein concentrations were determined using a Pierce BCA Protein assay Kit (Code: 23225, Thermo). After proteins were transferred to a PVDF Blotting membrane (GE Healthcare Life Sciences), the membrane was blocked with 100 mM Tris-HCl, pH 7.5, 0.9% NaCl, and 0.1% Tween 20 (TBST) containing 5% nonfat dry milk for 1 hour and then</p>                                                                                                                                                                                                                                                                                                                                                                                                                                                                                                                       |

|                                                                               |                                                                                                                                                                                                                                                                                                                                                                                                                                                                                                                                                                                                                                                                                                                                                                                                                                                                                                                                                                                |
|-------------------------------------------------------------------------------|--------------------------------------------------------------------------------------------------------------------------------------------------------------------------------------------------------------------------------------------------------------------------------------------------------------------------------------------------------------------------------------------------------------------------------------------------------------------------------------------------------------------------------------------------------------------------------------------------------------------------------------------------------------------------------------------------------------------------------------------------------------------------------------------------------------------------------------------------------------------------------------------------------------------------------------------------------------------------------|
|                                                                               | <p>incubated with primary antibodies at 4°C overnight. The primary antibodies were as follows: anti-HE4 (ab200828, Abcam), anti-type I collagen (#84336S, 1, CST), anti-<math>\alpha</math>SMA (ab5694, Abcam), anti-GAPDH (#2118, CST), ERK (#9102, CST), p-ERK (#4377, CST), Akt (#9272, CST), p-Akt (#9271, CST), Smad2/3 (#8685, CST), p-Smad2 (#18338, CST), p-Smad3 (#9520, CST), JNK (#9252, CST), p-JNK (#9251, CST), p38 (#9211, CST), p-p38 (#4511, CST). Membranes were then incubated with HRP-secondary antibodies for 1 hour at room temperature. Immunoreactive proteins were detected using ECL Prime (GE Healthcare UK Ltd.) with LAS-4000 Imaging system (FUJIFILM).</p>                                                                                                                                                                                                                                                                                     |
| <p><i>Immunofluorescence staining for fibroblast phenotyping in vitro</i></p> | <p>After 24 hours in culture, cells were fixed with 4% paraformaldehyde diluted in PBS for 20 minutes at room temperature. Further, cells were permeabilized with 0.1% Triton X-100. To assess the degree of differentiation, cells were double stained for F-actin using rhodamine-phalloidin (1:1000 dilution, P1951-.1MG, Sigma) and for <math>\alpha</math>-smooth muscle actin, using an antibody against <math>\alpha</math>SMA (1:500 dilution, #102M4804V, Sigma), to characterize stress fibers. The coverslips were mounted using Prolong Gold anti-fade with DAPI (1:1000, NX034, Dojindo). Fluorescence imaging was done using a confocal microscope TCS SP8 LS with 20X/0.4 objective. Degree of differentiation was evaluated by counting the number of cells positive for either F-actin or <math>\alpha</math>SMA stress fibers in three randomly chosen images with a minimum of 80 cells counted per sample. Results from these 3 samples were averaged.</p> |

**Table S1. Primer sequences used for quantitative real-time PCR.**

|                        | <b>Forward Primer</b>  | <b>Reverse Primer</b> |
|------------------------|------------------------|-----------------------|
| HE4 (human)            | CCCAATGATAAGGAGGGT     | ATTCATCTGGCCAGGAC     |
| HE4 (mouse)            | AACCAATTACGGACTGTGTGTT | TCGCTCGGTCCATTAGGCT   |
| $\alpha$ SMA (rat)     | GGGATCCTGACCCTGAAG     | AGTGGTGCCAGATCTTTT    |
| PAI-1 (rat)            | ACATCCTGGAAGTGCCT      | TGGTCATGTTGCTCTTCC    |
| FGF2 (rat)             | CGCCTGGAGTCCAATAAC     | ACAGTATGGCCTTCTGTC    |
| SM22 (rat)             | GGAACAGGTGGCTCAATTCT   | CCCAAAGCCATTACAGTCCT  |
| collagen1a1 (rat)      | GATGGACTCAACGGTCTC     | GGCAGGAAGCTGAAGTCA    |
| collagen3a1 (rat)      | ATGCATGTTTCTCCGGTTT    | CTCGGAATTGCAGAGACC    |
| TGF- $\beta$ 1 (rat)   | CGGACTACTACGCCAAAG     | TCCCCGAATGTCTGACGT    |
| TGF- $\beta$ 1 (human) | GCGTGCTAATGGTGGAAACC   | GCTTCTCGGAGCTCTGATGT  |
| Periostin (rat)        | CAAACCACTTTCACGGACCT   | TTGTTACAGGCGCTAACAG   |
| Fibronectin (rat)      | CAGCCCCTGATTGGAGTC     | TGGGTGACACCTGAGTGAAC  |
| TNF- $\alpha$ (human)  | GGACCTCTCTAATCAGCCC    | TGAAGAGGACCTGGGAGTAGA |
| IL-6 (human)           | TACATCCTCGACGGCATCTC   | TGGCTTGTTCCTCACTACTCT |
| GAPDH (rat)            | TCAAGAAGGTGGTGAAGCAG   | AGGTGGAAGAATGGGAGTTG  |
| 18S (human)            | CGGCTACCACATCCAAGGAA   | GCTGGAATTACCGCGGCT    |
| ANP (rat)              | AGGCCATATTGGAGCAAATC   | CATCTTCTCCTCCAGGTGGT  |
| $\beta$ -MHC (rat)     | CTGGCACCGTGGACTACAAT   | GCCCTTGTCTACAGGTGCAT  |

PCR, polymerase chain reaction; HE4, human epididymis protein 4;  $\alpha$ SMA, alpha smooth muscle actin; PAI-1, plasminogen activator inhibitor-1; FGF2, Fibroblast growth factor 2; SM22, smooth muscle protein 22; TGF- $\beta$ 1, Transforming Growth Factor- $\beta$ 1; TNF- $\alpha$ , tumor necrosis factor- $\alpha$ ; IL-6, Interleukin-6; GAPDH, Glyceraldehyde-3-phosphate dehydrogenase; ANP, atrial natriuretic peptides;  $\beta$ -MHC,  $\beta$ -myosin heavy chain

**Table S2. Baseline characteristics of the control and DCM groups.**

|                                              | Control<br>(n = 59) | DCM<br>(n = 87)     | <i>p</i> value |
|----------------------------------------------|---------------------|---------------------|----------------|
| HE4, pmol/L                                  | 44.1 [35.6-52.9]    | 59.65 [49.0-86.2]   | <0.0001        |
| Age, y                                       | 69 ± 3              | 60 ± 15             | <0.0001        |
| Male sex, n (%)                              | 30 (51)             | 62 (71)             | 0.012          |
| Body Mass Index, kg/m <sup>2</sup>           | 23.8 ± 3.9          | 23.8 ± 4.2          | 0.902          |
| Systolic blood pressure on admission, mmHg   | 123 ± 17            | 114 ± 17.4          | 0.002          |
| Hypertension, n (%)                          | 36 (61)             | 30 (35)             | 0.002          |
| Diabetes mellitus, n (%)                     | 17 (29)             | 15 (17)             | 0.105          |
| Dyslipidemia, n (%)                          | 43 (73)             | 34 (40)             | <0.0001        |
| Current smoker, n (%)                        | 14 (24)             | 14 (16)             | 0.250          |
| Atrial fibrillation, n (%)                   | 3 (5)               | 22 (25)             | 0.001          |
| Non-Sustained ventricular tachycardia, n (%) | 1 (2)               | 20 (23)             | <0.0001        |
| Ventricular fibrillation, n (%)              | 0 (0)               | 3 (3)               | 0.150          |
| Prior HF hospitalizations, n (%)             | 0 (0)               | 31 (36)             | <0.0001        |
| Laboratory examination parameters            |                     |                     |                |
| White blood cell, /μL                        | 6066 ± 1798.6       | 6387 ± 1938         | 0.313          |
| Hemoglobin, g/dL                             | 13.9 ± 1.64         | 14.2 ± 2.16         | 0.493          |
| hs-cTnT, ng/mL                               | 0.007 [0.003-0.010] | 0.015 [0.009-0.029] | 0.013          |
| BNP, pg/mL                                   | 16.6 [9.9-29.8]     | 249.0 [72.7-654.3]  | <0.0001        |
| Albumin, g/dL                                | 4.2 ± 0.33          | 3.9 ± 0.5           | <0.0001        |
| Serum sodium, mEq/L                          | 140 ± 1.8           | 139 ± 2.6           | 0.011          |
| Creatinine, mg/dL                            | 0.71 ± 0.16         | 0.93 ± 0.27         | <0.0001        |
| eGFR, mL/min*m <sup>2</sup>                  | 76 ± 11.8           | 65 ± 15.4           | <0.0001        |
| T-bil, mg/dL                                 | 0.8 ± 0.29          | 1.0 ± 0.59          | 0.009          |

|                                       |                  |                  |         |
|---------------------------------------|------------------|------------------|---------|
| CRP, mg/ml                            | 0.04 [0.02-0.08] | 0.13 [0.05-0.36] | 0.021   |
| HbA1c (NGSP)                          | 6.0 ± 1.00       | 5.8 ± 0.7        | 0.305   |
| Electrocardiogram parameters          |                  |                  |         |
| Heart rate, bpm                       | 68 ± 12.1        | 78 ± 18.5        | 0.001   |
| CLBBB, n (%)                          | 0 (0)            | 13 (15)          | 0.002   |
| QRS duration, msec                    | 99 ± 11.6        | 114.5 ± 29.3     | <0.0001 |
| Echocardiogram parameters             |                  |                  |         |
| LVEF, %                               | 65 ± 4.6         | 33 ± 10.7        | <0.0001 |
| LVEDD, mm                             | 44 ± 5.0         | 60 ± 8.7         | <0.0001 |
| LVESD, mm                             | 27 ± 4.2         | 51 ± 10.2        | <0.0001 |
| Intraventricular septal thickness, mm | 9.7 ± 1.5        | 9.3 ± 1.6        | 0.151   |
| LV posterior wall thickness, mm       | 9.7 ± 1.6        | 10.0 ± 1.6       | 0.348   |
| LVEDVi, ml/L/min/m <sup>2</sup>       | 38 ± 15.0        | 97 ± 35.2        | <0.0001 |
| LVESVi, ml/L/min/m <sup>2</sup>       | 13 ± 5.9         | 67 ± 31.6        | <0.0001 |
| LAD, mm                               | 34 ± 5.1         | 42 ± 8.2         | <0.0001 |

Data are number of patients (%), mean ± standard deviation (SD), and median (interquartile range).

DCM, dilated cardiomyopathy; HE4, human epididymis protein 4; HF, heart failure; hs-cTnT, high-sensitivity cardiac troponin T; BNP, B-type natriuretic peptide; eGFR, estimated glomerular filtration rate; T-bil, total bilirubin; CRP, c-reactive protein; CLBBB, complete left bundle branch block; LVEF, left ventricular ejection fraction; LVEDD, left ventricular end-diastolic diameter; LVESD, left ventricular end-systolic diameter; LV, left ventricular; LVEDVi, left ventricular end-diastolic volume index; LVESVi, left ventricular end-systolic volume index; LAD, left atrium diameter



**Table S3. Univariate and multivariate linear regression analyses of  $\Delta$ LVEDVi.**

|                                                        | Univariate Analysis  |                | Multivariate Analysis |                |
|--------------------------------------------------------|----------------------|----------------|-----------------------|----------------|
|                                                        | $\beta$ -coefficient | <i>p</i> Value | $\beta$ -coefficient  | <i>p</i> Value |
| Log (HE4), per 1 pmol/L increment                      | 0.344                | 0.006          | 0.518                 | 0.001          |
| Age, per 1-year increment                              | 0.086                | 0.499          | -0.094                | 0.484          |
| NYHA class $\geq$ III                                  | -0.089               | 0.484          |                       |                |
| Systolic blood pressure on admission, 1 mmHg increment | 0.007                | 0.954          |                       |                |
| Hypertension                                           | -0.091               | 0.473          |                       |                |
| Diabetes mellites                                      | -0.029               | 0.818          |                       |                |
| $\beta$ -blocker on discharge                          | -0.209               | 0.098          | -0.166                | 0.188          |
| ACE-I or ARB on discharge                              | -0.092               | 0.469          |                       |                |
| Log (BNP), per 1 pg/mL increment                       | -0.133               | 0.294          | -0.194                | 0.168          |
| Log (Creatinine), per 1 mg/dL increment                | -0.033               | 0.794          | -0.192                | 0.146          |
| eGFR, per 1 mL/(min $\cdot$ m <sup>2</sup> ) increment | -0.053               | 0.677          |                       |                |
| Log (CRP), per 1 mg/m increment                        | 0.107                | 0.407          |                       |                |
| QRS duration, per 1 mm increment                       | -0.057               | 0.657          |                       |                |
| CLBBB                                                  | 0.104                | 0.412          |                       |                |
| LVEF, per 1 % increment                                | 0.299                | 0.017          |                       |                |
| LVEDD, mm                                              | -0.381               | 0.002          | -0.359                | 0.009          |
| LVESD, mm                                              | -0.366               | 0.003          |                       |                |
| LGE                                                    | 0.039                | 0.778          | 0.091                 | 0.777          |

LVEDVi, left ventricular end-diastolic volume index; HE4, human epididymis protein 4; NYHA, New York Heart Association; ACE-I, angiotensin-converting enzyme inhibitor; ARB, angiotensin receptor blocker; BNP, B-type natriuretic peptide; eGFR, estimated glomerular filtration rate; CRP, c-reactive protein; CLBBB, complete left bundle branch block; LVEF, left ventricular ejection fraction; LVEDD, left ventricular end-diastolic diameter; LVESD, left ventricular end-systolic diameter; LGE, late gadolinium enhancement

**Table S4. Univariate and multivariate linear regression analyses of  $\Delta$ LVESVi.**

|                                                        | Univariate Analysis  |                | Multivariate Analysis |                |
|--------------------------------------------------------|----------------------|----------------|-----------------------|----------------|
|                                                        | $\beta$ -coefficient | <i>p</i> value | $\beta$ -coefficient  | <i>p</i> value |
| Log (HE4), per 1 pmol/L increment                      | 0.344                | 0.006          | 0.508                 | 0.001          |
| Age, per 1-year increment                              | 0.086                | 0.499          | -0.072                | 0.592          |
| NYHA class $\geq$ III                                  | -0.089               | 0.484          |                       |                |
| Systolic blood pressure on admission, 1 mmHg increment | 0.007                | 0.954          |                       |                |
| Hypertension                                           | -0.091               | 0.473          |                       |                |
| Diabetes mellites                                      | -0.029               | 0.818          |                       |                |
| $\beta$ -blocker on discharge                          | -0.209               | 0.098          | -0.153                | 0.227          |
| ACE-I or ARB on discharge                              | -0.092               | 0.469          |                       |                |
| Log (BNP), per 1 pg/mL increment                       | -0.133               | 0.294          | -0.195                | 0.168          |
| Log (Creatinine), per 1 mg/dL increment                | -0.033               | 0.794          | -0.175                | 0.192          |
| eGFR, per 1 mL/(min*m2) increment                      | -0.053               | 0.677          |                       |                |
| Log (CRP), per 1 mg/m increment                        | 0.107                | 0.407          |                       |                |
| QRS duration, per 1 mm increment                       | -0.057               | 0.657          |                       |                |
| CLBBB                                                  | 0.104                | 0.412          |                       |                |
| LVEF, per 1 % increment                                | 0.299                | 0.017          |                       |                |
| LVEDD, mm                                              | -0.381               | 0.002          |                       |                |
| LVESD, mm                                              | -0.366               | 0.003          | -0.364                | 0.009          |
| LGE                                                    | 0.039                | 0.778          | 0.109                 | 0.356          |

LVESVi, left ventricular end-systolic volume index; HE4, human epididymis protein 4; NYHA, New York Heart Association; ACE-I, angiotensin-converting enzyme inhibitor; ARB, angiotensin receptor blocker; BNP, B-type natriuretic peptide; eGFR, estimated glomerular filtration rate; CRP, c-reactive protein; CLBBB, complete left bundle branch block; LVEF, left ventricular ejection fraction; LVEDD, left ventricular end-diastolic diameter; LVESD, left ventricular end-systolic diameter; LGE, late gadolinium enhancement

**Table S5. Univariate and multivariate logistic regression analyses of LVRR positive.**

|                                                        | Univariate Analysis |         | Multivariate Analysis |         |
|--------------------------------------------------------|---------------------|---------|-----------------------|---------|
|                                                        | B                   | p value | B                     | p value |
| Log (HE4), per 1 pmol/L increment                      | -0.398              | 0.001   | -0.615                | <0.0001 |
| Age, per 1 year increment                              | -0.209              | 0.094   | -0.032                | 0.830   |
| NYHA class $\geq$ III                                  | -0.123              | 0.329   |                       |         |
| Systolic blood pressure on admission, 1 mmHg increment | 0.163               | 0.195   |                       |         |
| Hypertension                                           | 0.150               | 0.235   |                       |         |
| Diabetes mellites                                      | 0.072               | 0.569   |                       |         |
| $\beta$ -blocker on discharge                          | 0.003               | 0.983   | 0.074                 | 0.584   |
| ACE-I or ARB on discharge                              | -0.070              | 0.585   |                       |         |
| Log (BNP), per 1 pg/mL increment                       | 0.058               | 0.646   | 0.419                 | 0.008   |
| Log (Creatinine), per 1 mg/dL increment                | -0.109              | 0.387   | 0.241                 | 0.096   |
| eGFR, per 1 mL/(min*m2) increment                      | 0.148               | 0.238   |                       |         |
| Log (CRP), per 1 mg/m increment                        | -0.151              | 0.239   |                       |         |
| QRS duration, per 1 mm increment                       | -0.060              | 0.636   |                       |         |
| CLBBB                                                  | -0.177              | 0.158   |                       |         |
| LVEF, per 1 % increment                                | -0.050              | 0.694   |                       |         |
| LVEDD, mm                                              | -0.045              | 0.721   | -0.260                | 0.068   |
| LVESD, mm                                              | -0.087              | 0.492   |                       |         |
| LGE                                                    | 0.133               | 0.329   | 0.026                 | 0.844   |

LVRR, left ventricular reverse remodeling; HE4, human epididymis protein 4; NYHA, New York Heart Association; ACE-I, angiotensin-converting enzyme inhibitor; ARB, angiotensin receptor blocker; BNP, B-type natriuretic peptide; eGFR, estimated glomerular filtration rate; CRP, c-reactive protein; LVEF, left ventricular ejection fraction; LVEDD, left ventricular end-diastolic diameter; LVESD, left ventricular end-systolic diameter; LGE, late gadolinium enhancement

**Table S6. Results of multivariate Cox regression analysis for the primary endpoint.**

| Factor                          | Multivariate Analysis |            |                |
|---------------------------------|-----------------------|------------|----------------|
|                                 | HR                    | 95% CI     | <i>p</i> value |
| Model 1                         |                       |            |                |
| Log HE4                         | 7.91                  | 3.49-17.94 | <0.0001        |
| Age (years)                     | 0.97                  | 0.95-1.00  | 0.074          |
| Model 2                         |                       |            |                |
| Log HE4                         | 5.07                  | 2.25-11.43 | <0.0001        |
| NYHA class $\geq$ III           | 2.12                  | 0.58-3.82  | 0.405          |
| Model 3                         |                       |            |                |
| Log HE4                         | 4.92                  | 2.34-10.35 | <0.0001        |
| Systolic blood pressure (mmHg)  | 0.97                  | 0.93-1.00  | 0.058          |
| Model 4                         |                       |            |                |
| Log HE4                         | 5.09                  | 2.31-11.19 | <0.0001        |
| Prior HF hospitalizations (yes) | 3.23                  | 1.27-8.21  | 0.014          |
| Model 5                         |                       |            |                |
| Log HE4                         | 4.29                  | 1.85-9.94  | 0.001          |
| Sodium (mEq/L)                  | 0.90                  | 0.78-1.03  | 0.130          |
| Model 6                         |                       |            |                |
| Log HE4                         | 5.09                  | 2.05-12.64 | <0.0001        |
| Log Creatinine                  | 1.57                  | 0.28-8.76  | 0.606          |

|               |      |            |         |
|---------------|------|------------|---------|
| Model 7       |      |            |         |
| Log HE4       | 6.49 | 2.98-14.14 | <0.0001 |
| T-bil (mg/dL) | 2.32 | 1.26-4.28  | 0.007   |
| Model 8       |      |            |         |
| Log HE4       | 6.68 | 2.43-18.37 | <0.0001 |
| Log CRP       | 0.92 | 0.64-1.31  | 0.640   |
| Model 9       |      |            |         |
| Log HE4       | 5.16 | 2.26-11.76 | <0.0001 |
| Log BNP       | 1.16 | 0.77-1.75  | 0.474   |
| Model 10      |      |            |         |
| Log HE4       | 8.81 | 3.78-20.51 | <0.0001 |
| LVEDD (mm)    | 1.12 | 1.06-1.18  | <0.0001 |
| Model 11      |      |            |         |
| Log HE4       | 9.13 | 3.78-22.08 | <0.0001 |
| LGE (yes)     | 2.55 | 0.89-7.31  | 0.082   |

---

HR, hazard ratio; HE4, human epididymis protein 4; NYHA, New York Heart Association; HF, heart failure; T-bil, total bilirubin; CRP, c-reactive protein; BNP, B-type natriuretic peptide; LVEDD, left ventricular end-diastolic diameter; LGE, late gadolinium enhancement

**Table S7. Parameters at harvest in BALB/cA WT and genetically induced HFrEF model mice (Homo).**

|                                                   | WT (n = 7)  | Homo (n = 7) | <i>p</i> value |
|---------------------------------------------------|-------------|--------------|----------------|
| Age, week                                         | 6           | 6            | 1.000          |
| Body weight, g                                    | 18.3 ± 1.15 | 17.1 ± 1.76  | 0.134          |
| Heart rate, bpm                                   | 715 ± 43.6  | 681 ± 57.8   | 0.243          |
| Echocardiogram parameters at 1 day before harvest |             |              |                |
| LVEDD, mm                                         | 2.63 ± 0.39 | 4.74 ± 1.03  | 0.001          |
| LVESD, mm                                         | 1.47 ± 0.42 | 3.91 ± 1.13  | 0.001          |
| Intraventricular septal thickness, mm             | 0.59 ± 0.09 | 0.44 ± 0.05  | 0.005          |
| LV posterior wall thickness, mm                   | 0.63 ± 0.14 | 0.36 ± 0.05  | 0.001          |
| %FS, %                                            | 44.6 ± 11.1 | 18.5 ± 8.93  | <0.0001        |
| Organ weight at harvest                           |             |              |                |
| Heart/tibial length, mg/mm                        | 7.07 ± 0.62 | 13.5 ± 3.63  | 0.003          |
| Lung/tibial length, mg/mm                         | 8.92 ± 0.80 | 13.9 ± 5.93  | 0.070          |
| Kidney/tibial length, mg/mm                       | 8.93 ± 0.62 | 8.36 ± 0.52  | 0.091          |

Values are mean ± SD. WT, Wild-type; HFrEF, heart failure with reduced ejection fraction; LVEDD, left ventricular end-diastolic diameter; LVESD, left ventricular end-systolic diameter; LV, left ventricular; %FS, % fractional shortening

**Table S8. Parameters at harvest 4 weeks after MI-induced HFrEF model mice in BALB/cA WT mice.**

|                                                   | Sham-operated (n = 7) | MI (n = 7)  | <i>p</i> value |
|---------------------------------------------------|-----------------------|-------------|----------------|
| Age, week                                         | 12                    | 12          | 1.000          |
| Body weight, g                                    | 23.8 ± 0.93           | 23.8 ± 1.41 | 0.976          |
| Heart rate, bpm                                   | 643 ± 59.0            | 677 ± 41.8  | 0.241          |
| Echocardiogram parameters at 1 day before harvest |                       |             |                |
| LVEDD, mm                                         | 3.00 ± 0.59           | 3.71 ± 0.42 | 0.025          |
| LVESD, mm                                         | 1.30 ± 0.51           | 2.69 ± 0.53 | <0.0001        |
| Intraventricular septal thickness, mm             | 0.63 ± 0.10           | 0.30 ± 0.10 | <0.0001        |
| LV posterior wall thickness, mm                   | 0.64 ± 0.08           | 0.50 ± 0.12 | 0.021          |
| %FS, %                                            | 58.0 ± 10.2           | 28.1 ± 7.32 | <0.0001        |
| Organ weight at harvest                           |                       |             |                |
| Heart/tibial length, mg/mm                        | 8.28 ± 0.76           | 9.35 ± 1.38 | 0.103          |
| Lung/tibial length, mg/mm                         | 8.31 ± 0.38           | 8.58 ± 0.69 | 0.387          |
| Liver/tibial length, mg/mm                        | 63.5 ± 5.07           | 66.0 ± 6.72 | 0.443          |
| Kidney/tibial length, mg/mm                       | 12.3 ± 0.82           | 12.2 ± 2.03 | 0.927          |

Values are mean ± SD. MI, myocardial infarction; HFrEF, heart failure with reduced ejection fraction; WT, Wild-type; LVEDD, left ventricular end-diastolic diameter; LVESD, left ventricular end-systolic diameter; LV, left ventricular; %FS, % fractional shortening

**Figure S1. Flow chart of patient enrollment protocol in the present study.**

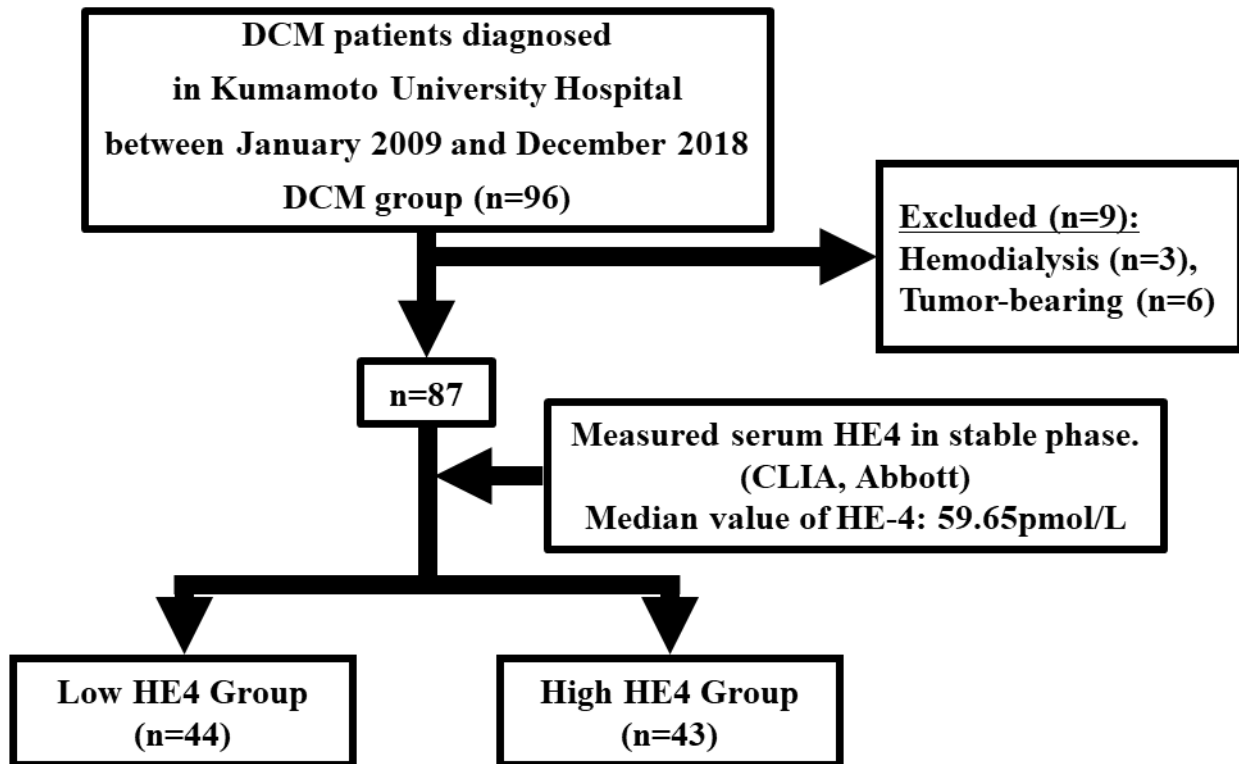

**Followed the data of each patient.**

We excluded 9 patients because they were undergoing hemodialysis or had a tumor. According to the median value of HE4 (59.65 pmol/L), we divided all DCM patients into the high HE4 group (n = 43) and the low HE4 group (n = 44).

HE4: human epididymis protein 4, DCM: dilated cardiomyopathy



Figure S2. Serum HE4 levels in the control and DCM group.

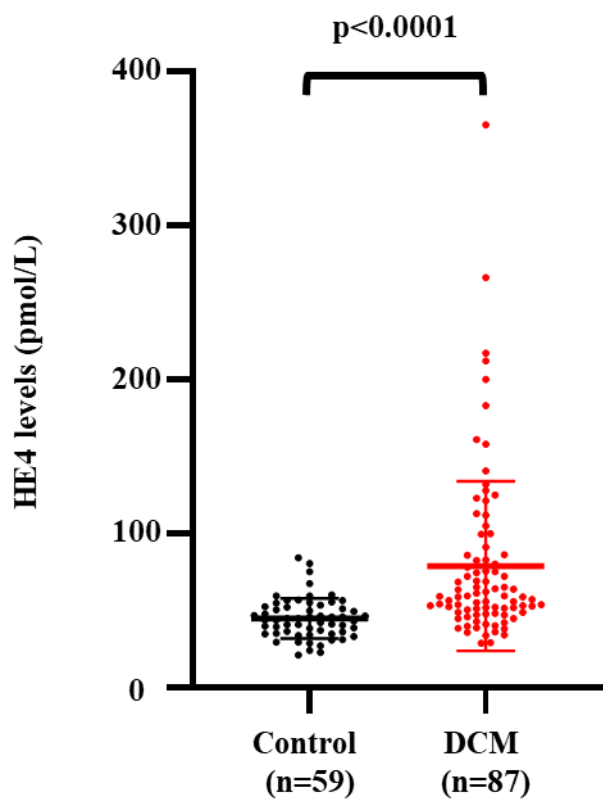

Unpaired t-tests were used to compare groups.

HE4: human epididymis protein 4, DCM: dilated cardiomyopathy

**Figure S3. HE4 is upregulated at kidney tissue in situation of HF<sub>r</sub>EF.**

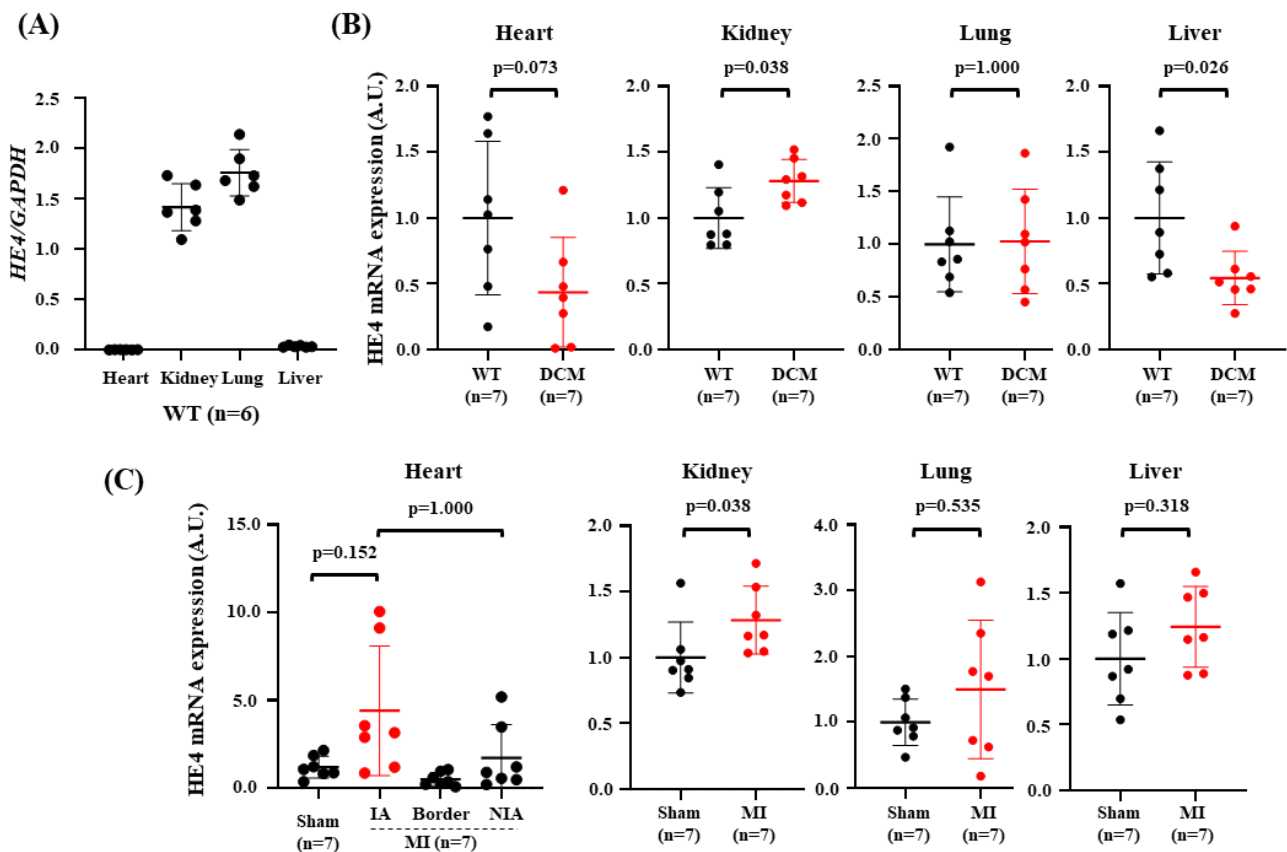

(A) The expression profile of HE4 in the heart, kidneys, lungs, and liver of BALB/cJ WT mice (n = 6). GAPDH was used as an internal control. (B) Quantitative evaluation of HE4 mRNA expression normalized to GAPDH mRNA expression in each tissue from DCM model mice (n = 7) and their WT littermates (n = 7) using the standard curve-method. The ratio of DCM mice to WT mice is shown. (C) Quantitative evaluation of HE4 mRNA expression normalized to GAPDH in heart, kidneys, lungs, and liver from MI model mice (n = 7) and sham operated mice (n = 7) using standard curve-method. The ratio of MI to sham operated mice is shown.

HE4: human epididymis protein 4, WT: wild type, GAPDH: glyceraldehyde-3-phosphate dehydrogenase, MI: myocardial infarction, IA: infarcted area, NIA: non-infarcted area

**Figure S4. Overexpression of HE4 have no impact on the expression of inflammatory-related and fibrosis-related genes in HEK293T cells.**

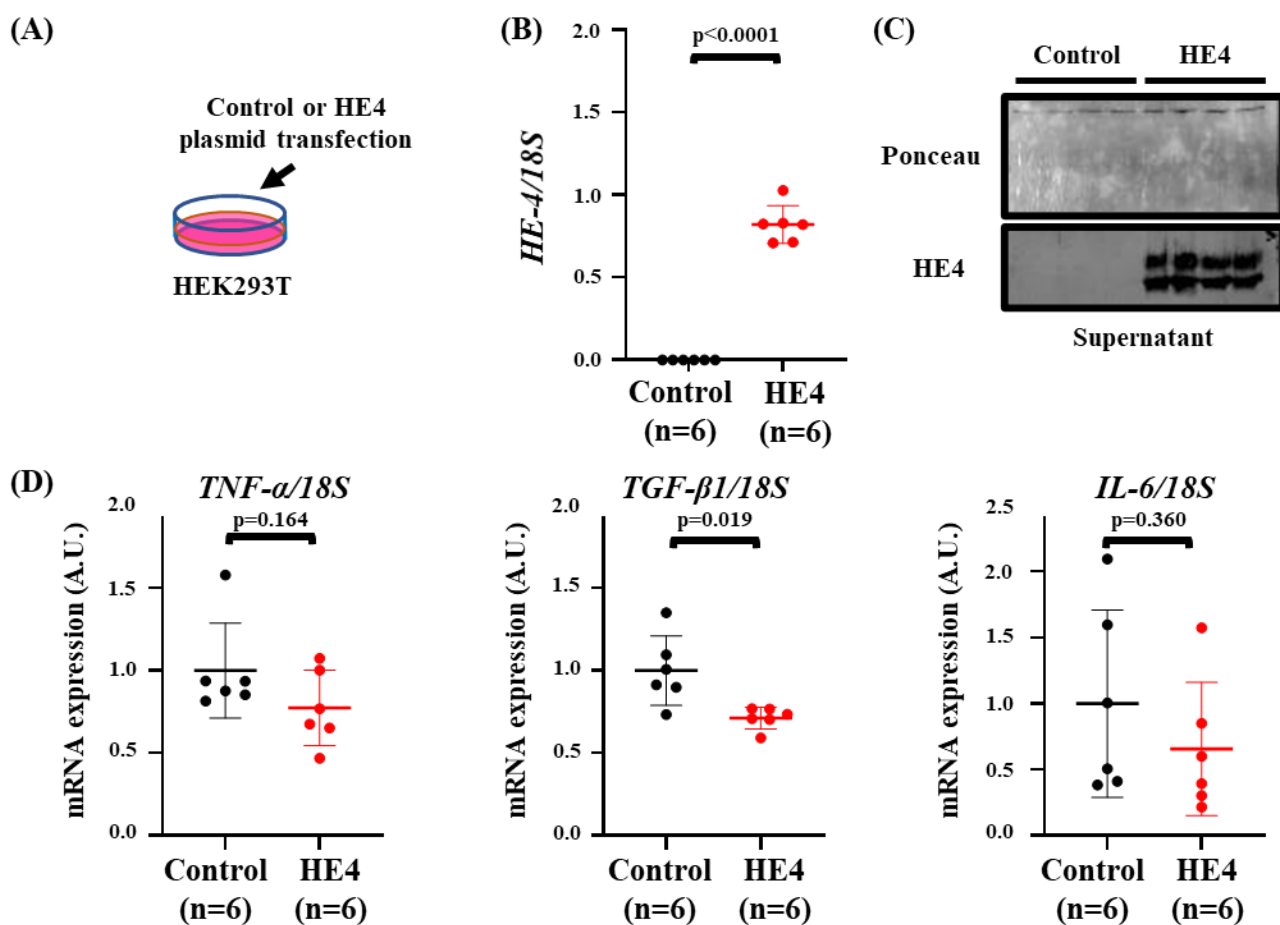

(A) Experimental scheme for HE4 overexpression. (B) qRT-PCR analysis in HEK293T cells transfected with control or HE4 plasmid. 18S was used as an internal control. (C) WB for HE4 in supernatant of control or HE4 plasmid transfected HEK293T. (D) qRT-PCR analysis in HEK293T cells transfected with control or HE4 plasmid. 18S was used as an internal control.

Unpaired t-tests with Welch's correction were used to compare groups.

WB: western blotting, HE4: human epididymis protein 4, HEK293T: human embryonic kidney 293T, qRT-PCR: quantitative reverse-transcription polymerase chain reaction, TNF- $\alpha$ : tumor necrosis factor- $\alpha$ , TGF- $\beta$ 1: transforming growth factor- $\beta$ 1, IL-6: interleukin-6

**Figure S5. The addition of the supernatant that contained HE4 show no elevations of hypertrophy-related genes expression in cardiomyocytes.**

**(A)**

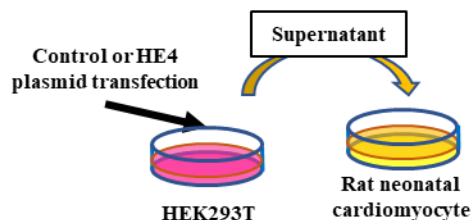

**(B)**

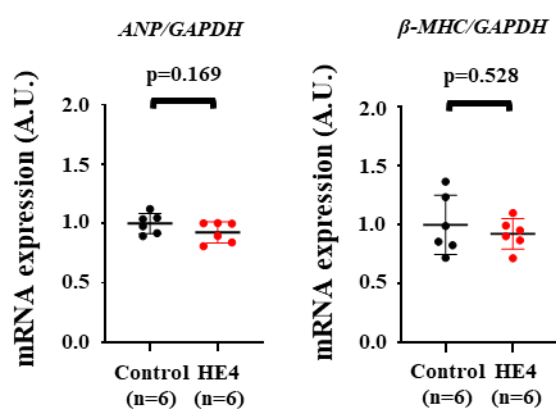

(A) Experimental scheme for HE4 overexpression and transfer to cardiomyocyte. (B) Cardiac hypertrophy-related genes were evaluated by qRT-PCR. The measurements were standardized to expression of the GAPDH.

Unpaired t-tests with Welch's correction were used to compare groups.

HE4: human epididymis protein 4, HEK293T: human embryonic kidney 293T, GAPDH: glyceraldehyde-3-phosphate dehydrogenase, ANP: atrial natriuretic peptides,  $\beta$ -MHC:  $\beta$ -myosin heavy chain, qRT-PCR: quantitative reverse-transcription polymerase chain reaction

**Figure S6. HE4 does not affect the activity of Smad2, p38 MAP kinase, Akt, and JNK**

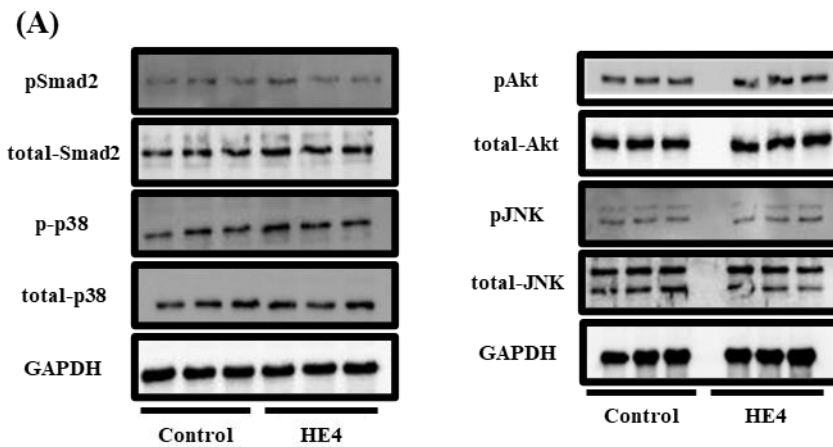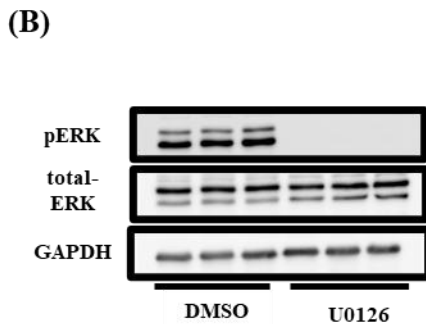

(A) WB for intracellular signaling other than ERK in cardiac fibroblasts treated with HEK293T culture medium. (B) WB for ERK in cardiac fibroblasts treated with HEK293T culture medium and U0126, MEK 1/2 inhibitor, or DMSO.

WB: western blotting, ERK: extracellular signal-regulated kinase, HE4: human epididymis protein 4, HEK293T: human embryonic kidney 293T, GAPDH: glyceraldehyde-3-phosphate dehydrogenase, DMSO: dimethyl sulfoxide
